# Supplementary material for: Fabrication and Characterization of Bioresorbable Drug-coated Porous Scaffolds for Vascular Tissue Engineering
Source: MDPI journal article supplement (doi:10.3390/ma12091438), 2019-05-02
Supplement: s1 [file s1]

Supplementary Information

# Fabrication and Characterization of Bioresorbable Drug-coated Porous Scaffolds for Vascular Tissue Engineering

Jueun Kim <sup>1</sup>, Su A. Park <sup>2</sup>, Jei Kim <sup>3</sup> and Jaejong Lee <sup>1,\*</sup>

<sup>1</sup> Department of Nano Manufacturing Technology, Nano-Convergence Mechanical Systems Research Division, Korea Institute of Machinery & Materials (KIMM), 156 Gajeongbuk-Ro, Yuseong-Gu, Daejeon 34103, Korea; jekim@kimm.re.kr

<sup>2</sup> Department of Nature-inspired Nano Convergence Systems, Nano-Convergence Mechanical Systems Research Division, Korea Institute of Machinery & Materials (KIMM), 156 Gajeongbuk-Ro, Yuseong-Gu, Daejeon 34103, Korea; psa@kimm.re.kr

<sup>3</sup> Department of Neurology, Chungnam National University Hospital, 282 Munhwa-ro, Jung-gu, Daejeon 35015, Korea; jeikim@cnu.ac.kr

\* Correspondence: jjlee@kimm.re.kr; Tel.: +82-42-868-7145

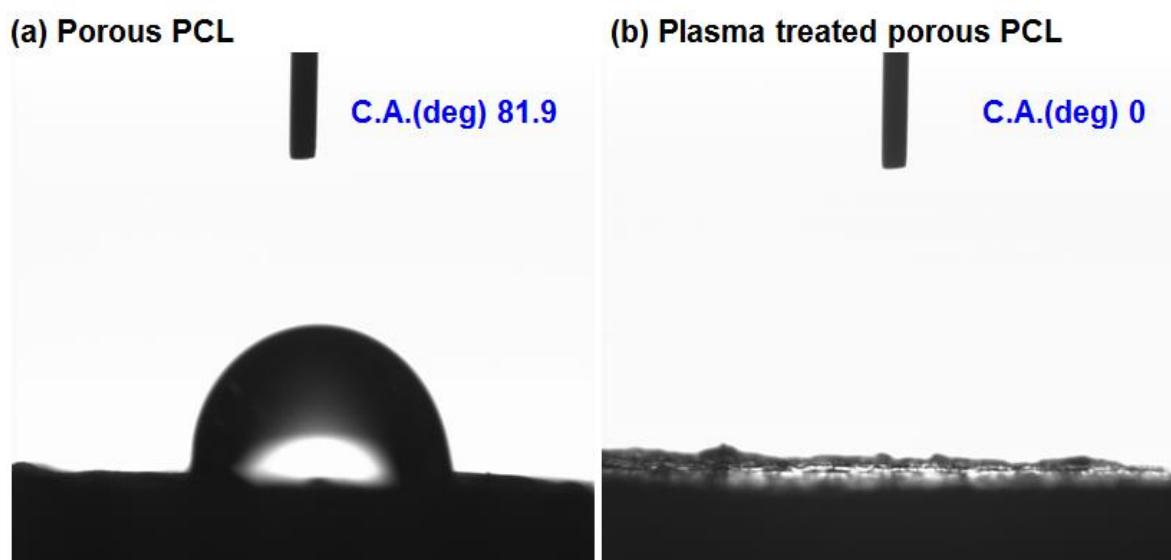

**Figure S1.** Water contact angle measurement before (a) and after plasma treatment (b).

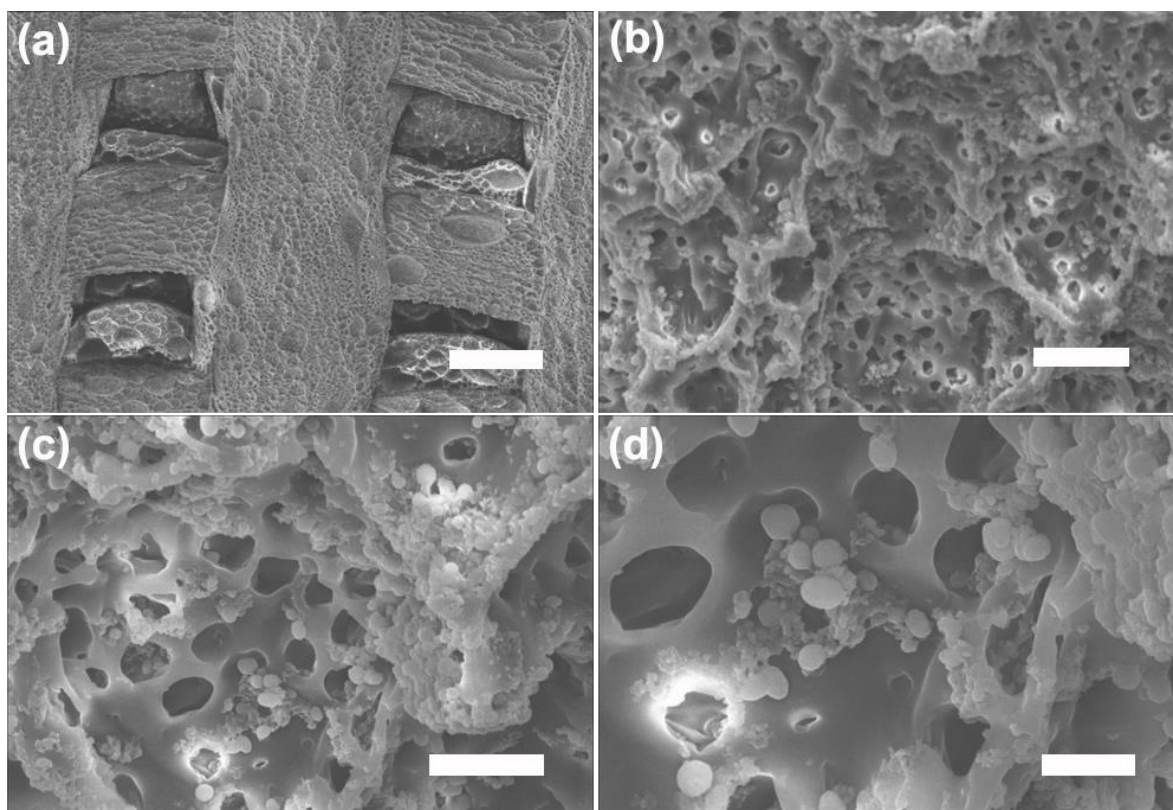

**Figure S2.** SEM image of the particles formed on the surface of the drug-coated porous PCL scaffold. Scale bars: 200  $\mu\text{m}$  (a), 10  $\mu\text{m}$  (b), 5  $\mu\text{m}$  (c) and 2  $\mu\text{m}$  (d).

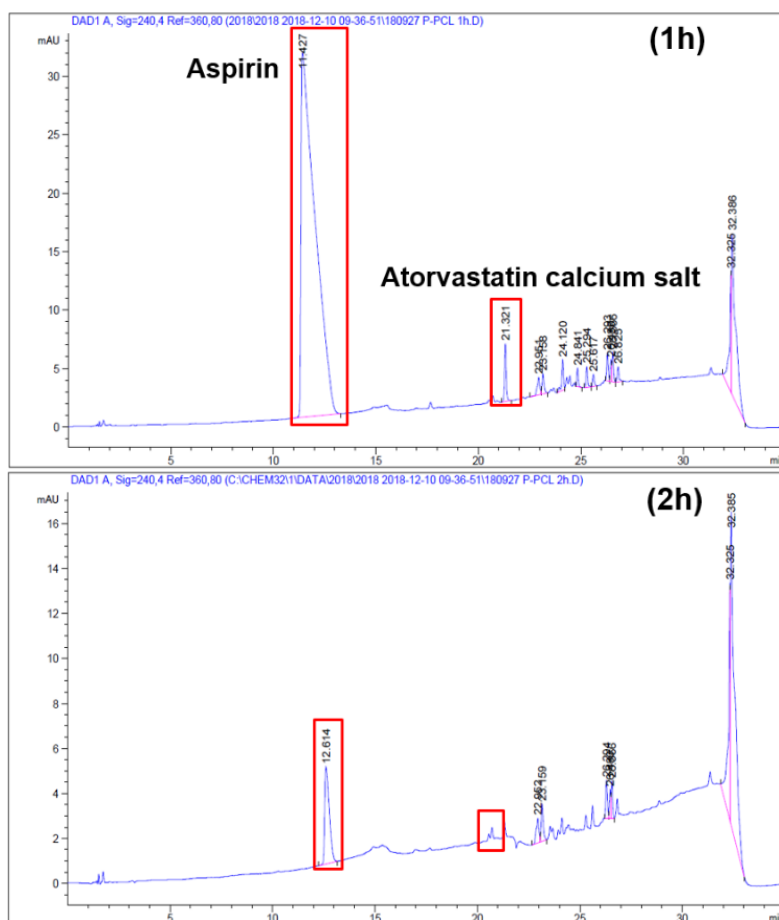

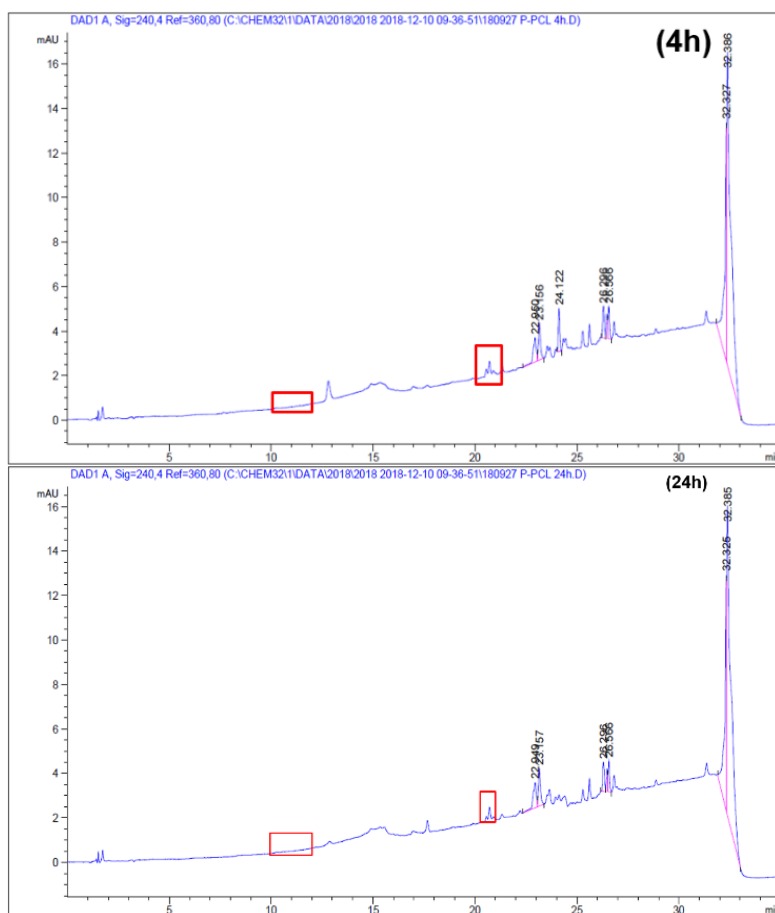

Figure S3. Drug content of the drug-coated porous PCL scaffold after drug release for 1, 2, 4 and 24 h.

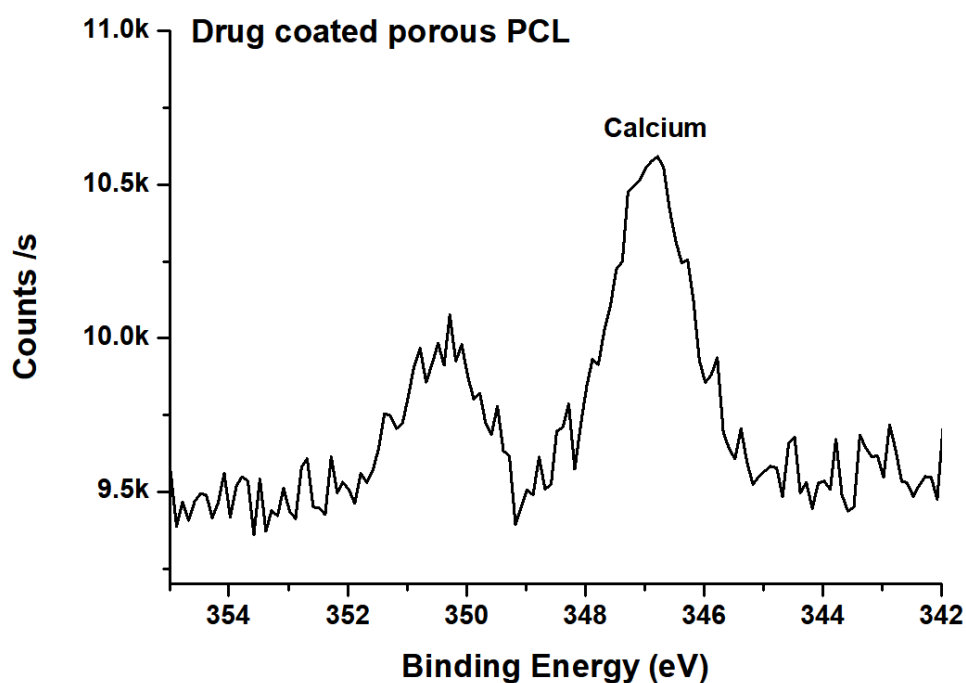

Figure S4. XPS analysis of the high-resolution Ca<sub>2</sub>p peak at 347 eV observed only in the spectrum of the drug-coated porous PCL scaffold.
